# Supplementary material for: Convolutional Neural Network and Optical Flow for the Assessment of Wave and Tide Parameters from Video Analysis (LEUCOTEA): An Innovative Tool for Coastal Monitoring
Source: MDPI journal article supplement (doi:10.3390/rs14132994), 2022-06-22
Supplement: s1 [file s1]

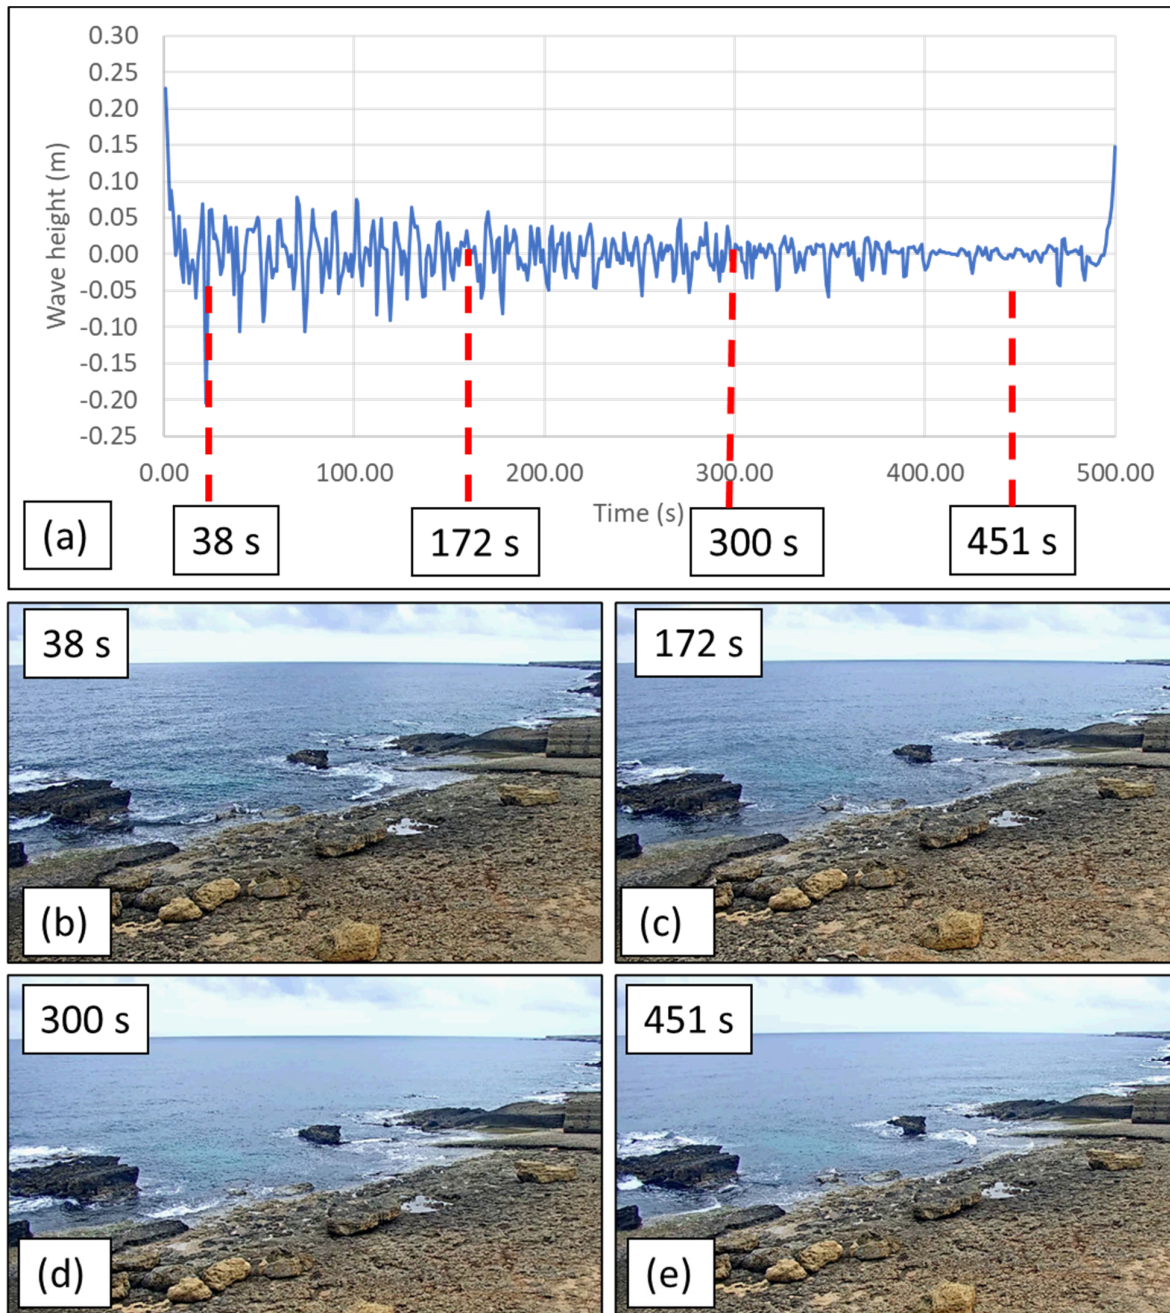

**Figure S1.** Assessment of wave height impacting on Santa Lucia (Italy); (a) scatter plot of wave height obtained by optical flow; (b) frames of surveillance camera at 38 s from starting video; (c) frames of surveillance camera at 172 s from starting video; (d) frames of surveillance camera at 300 s from starting video; (e) frames of surveillance camera at 451 s from starting video.

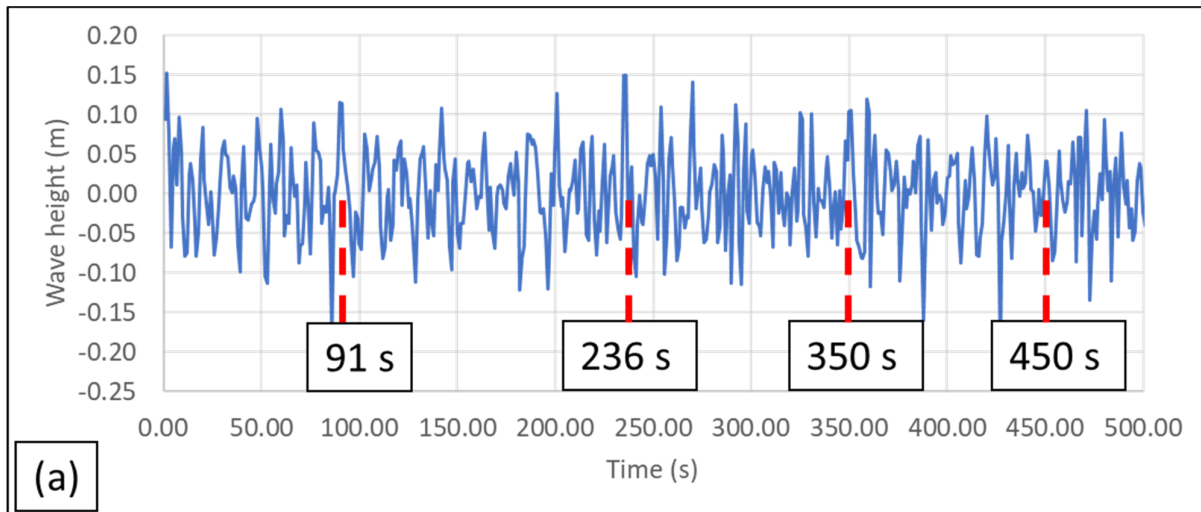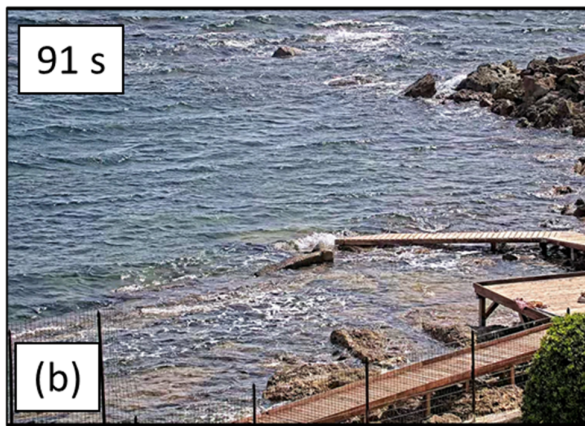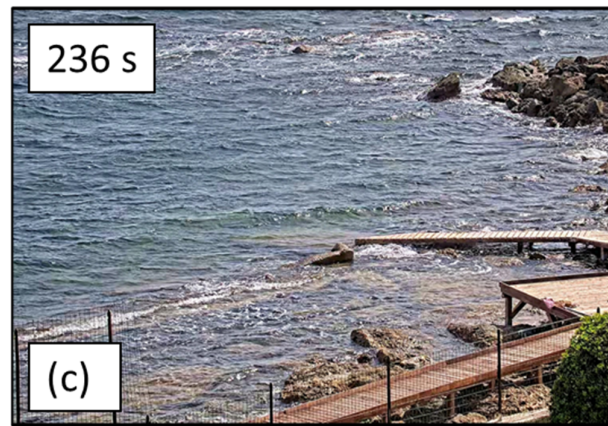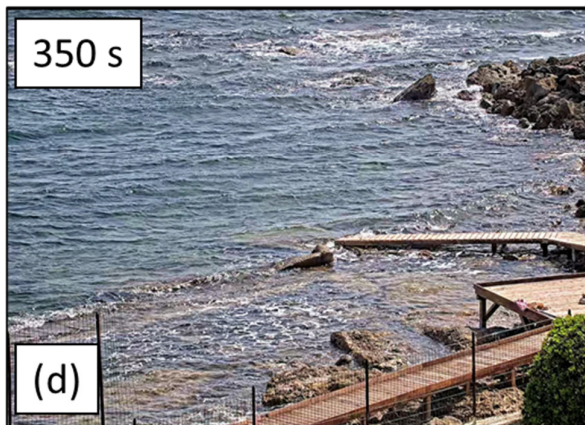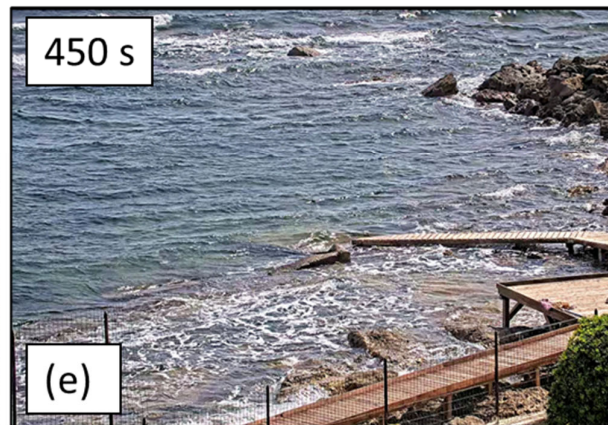

**Figure S2.** Assessment of wave height impacting on Varco 11 (Italy); (a) scatter plot of wave height obtained by optical flow; (b) frames of surveillance camera at 91 s from starting video; (c) frames of surveillance camera at 236 s from starting video; (d) frames of surveillance camera at 350 s from starting video; (e) frames of surveillance camera at 450 s from starting video.



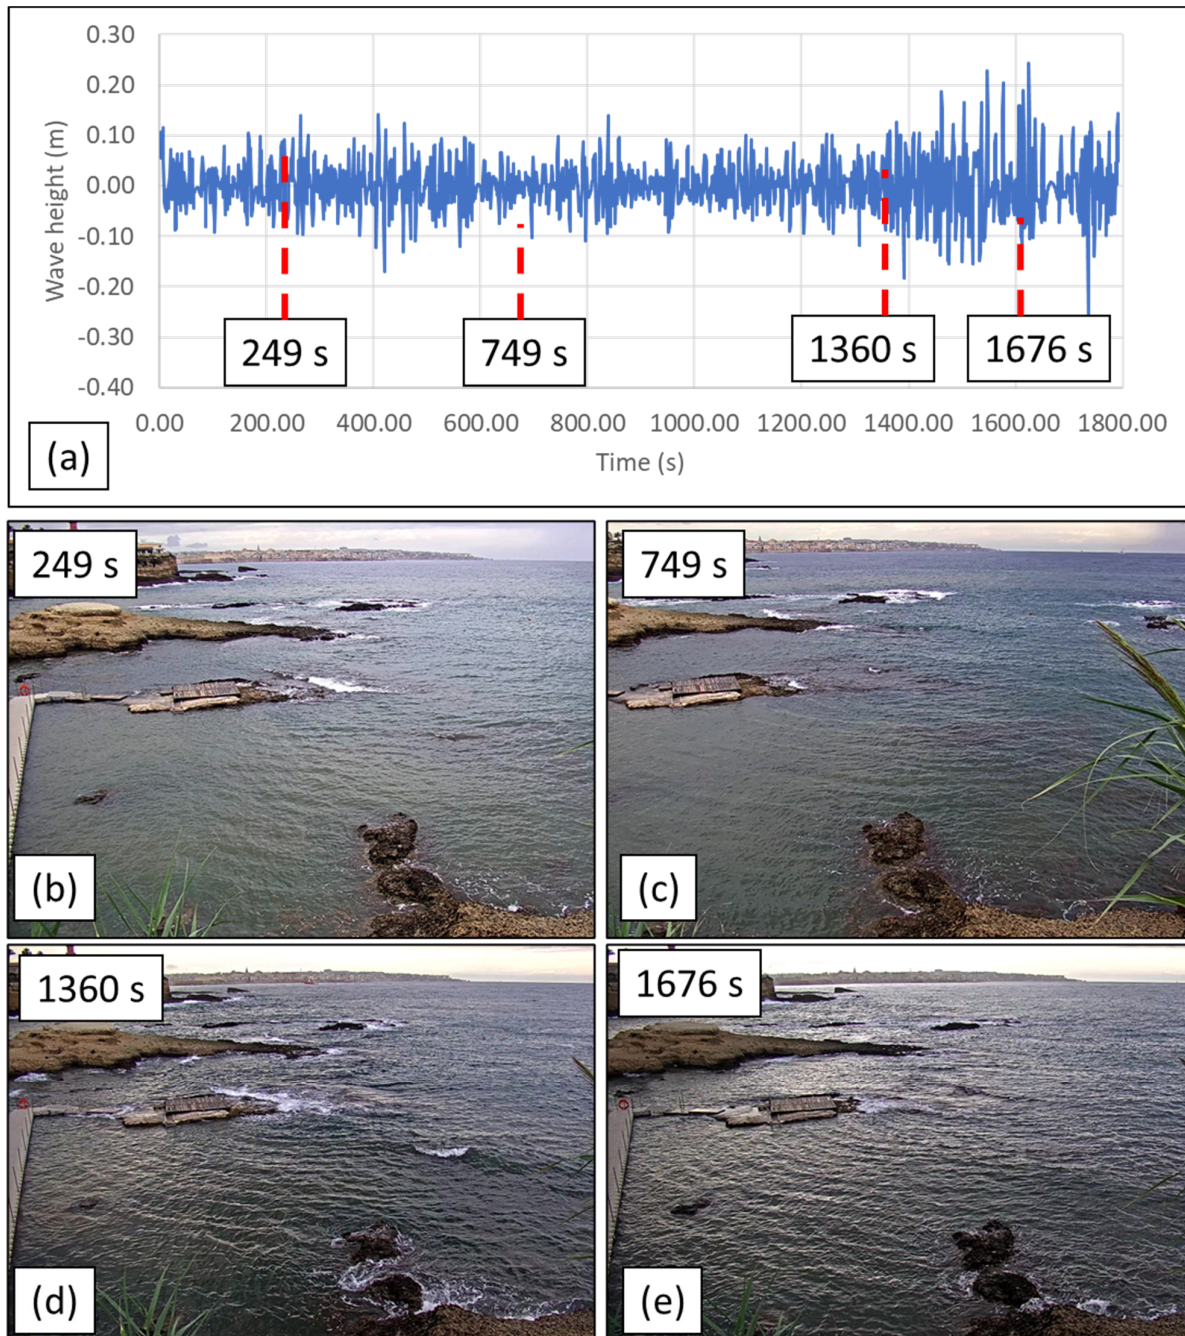

**Figure S3.** Assessment of wave height impacting on Massolivieri (Italy); (a) scatter plot of wave height obtained by optical flow; (b) frames of surveillance camera at 249 s from starting video; (c) frames of surveillance camera at 749 s from starting video; (d) frames of surveillance camera at 1360 s from starting video; (e) frames of surveillance camera at 1676 s from starting video.

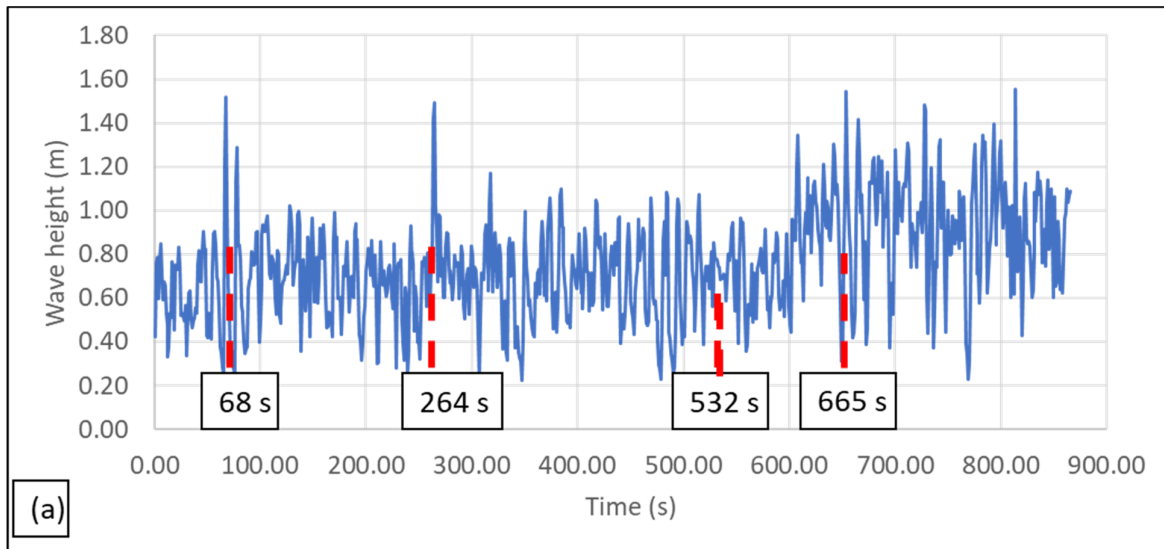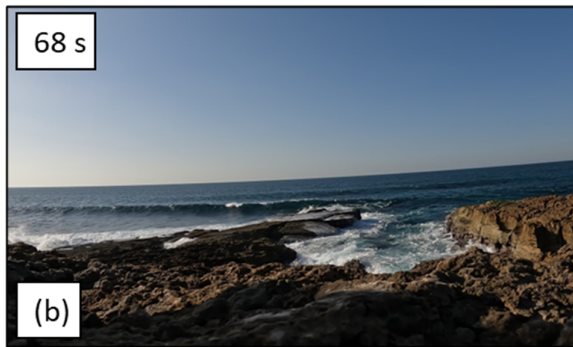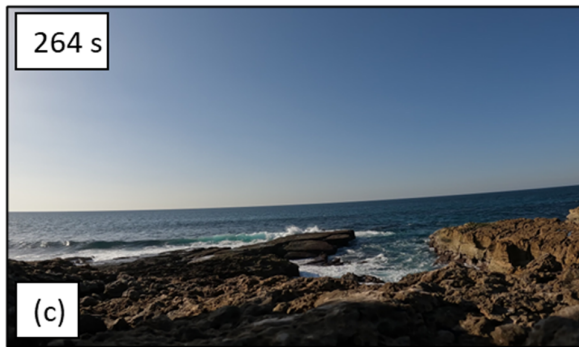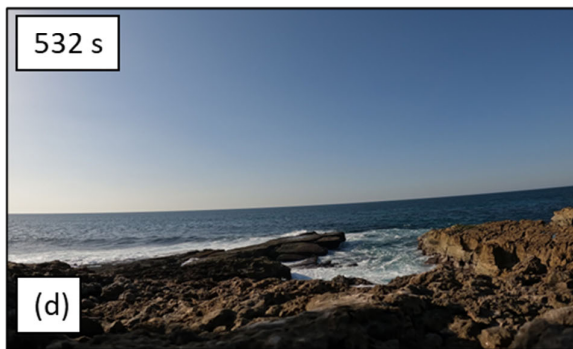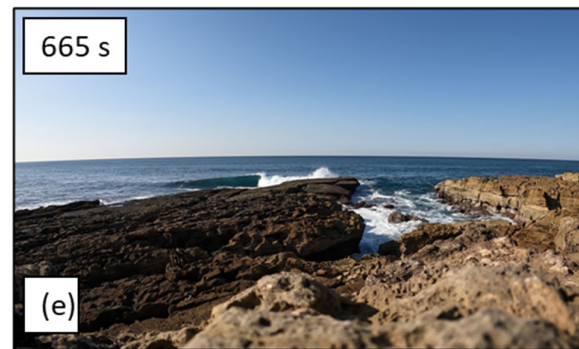

**Figure S4.** Assessment of wave height impacting on Coxos (Portugal); (a) scatter plot of wave height obtained by optical flow; (b) frames of action camera at 69 s from starting video; (c) frames of action camera at 264 s from starting video; (d) frames of action camera at 532 s from starting video; (e) frames of action camera at 665 s from starting video.



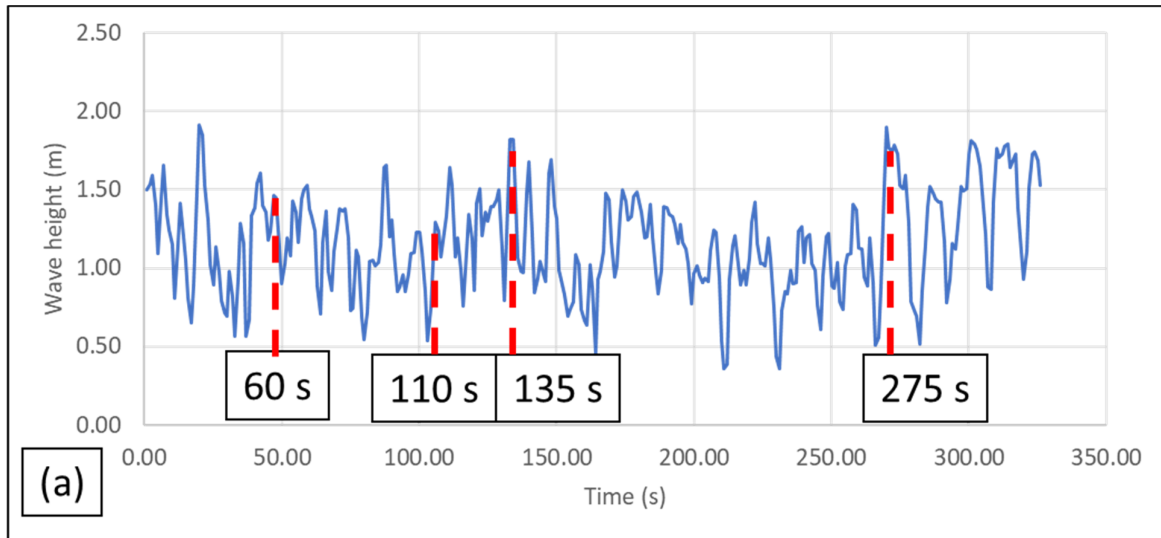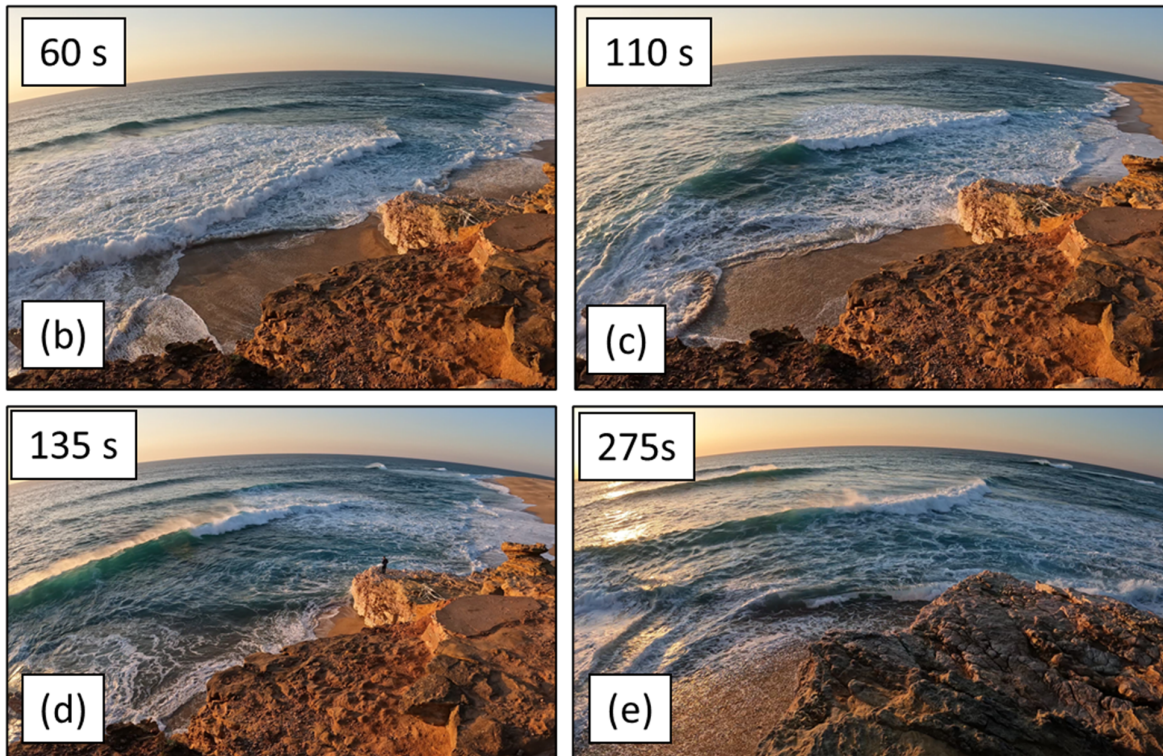

**Figure S5.** Assessment of wave height impacting on Nazaré (Portugal); (a) scatter plot of wave height obtained by optical flow; (b) frames of action camera at 60 s from starting video; (c) frames of action camera at 110 s from starting video; (d) frames of action camera at 135 s from starting video; (e) frames of action camera at 275 s from starting video.

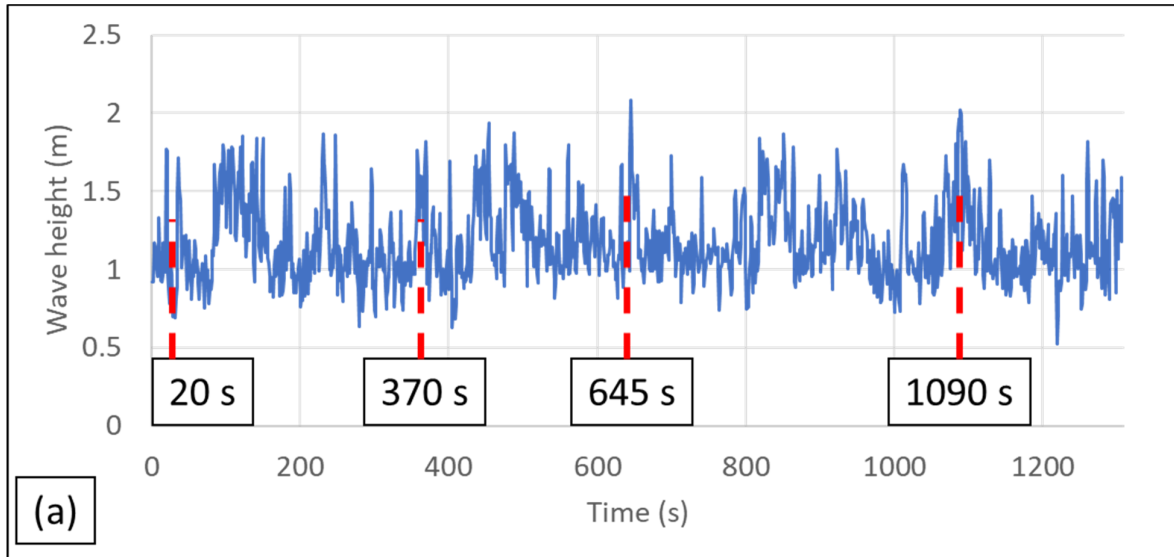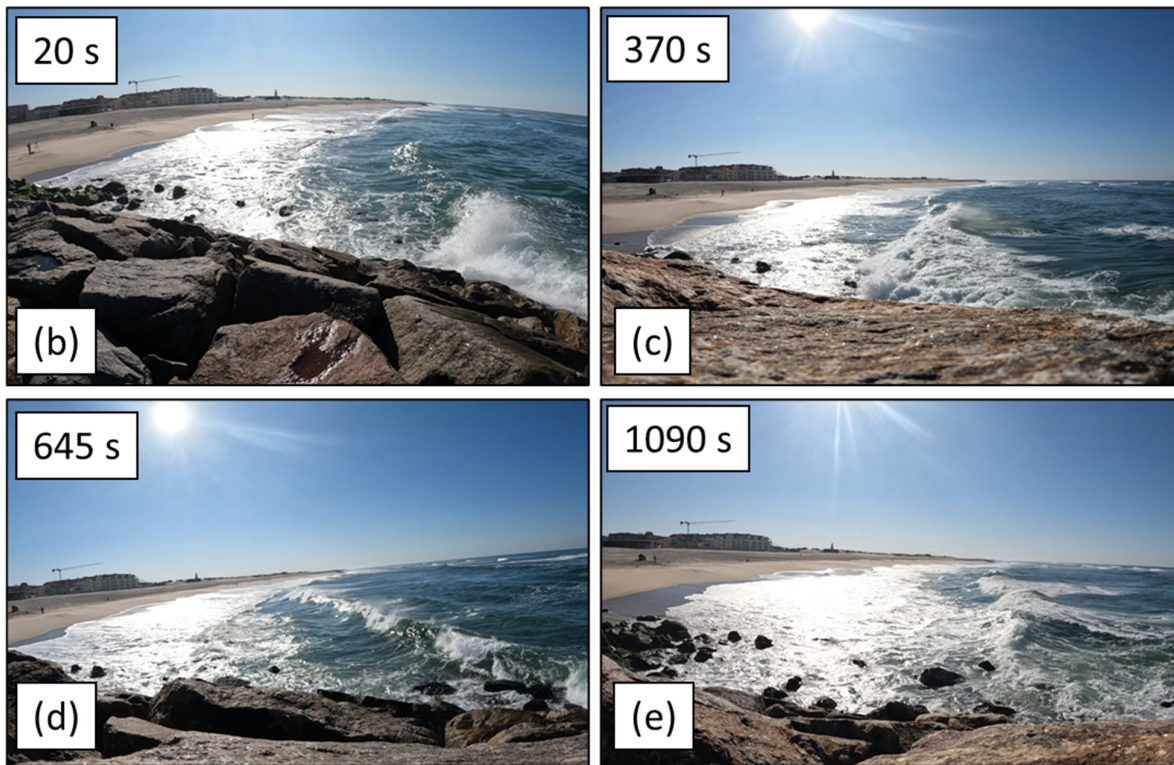

**Figure S6.** Assessment of wave height impacting on Costa Nova (Portugal); (a) scatter plot of wave height obtained by optical flow; (b) frames of action camera at 20 s from starting video; (c) frames of action camera at 370 s from starting video; (d) frames of action camera at 645 s from starting video; (e) frames of action camera at 1090 s from starting video.



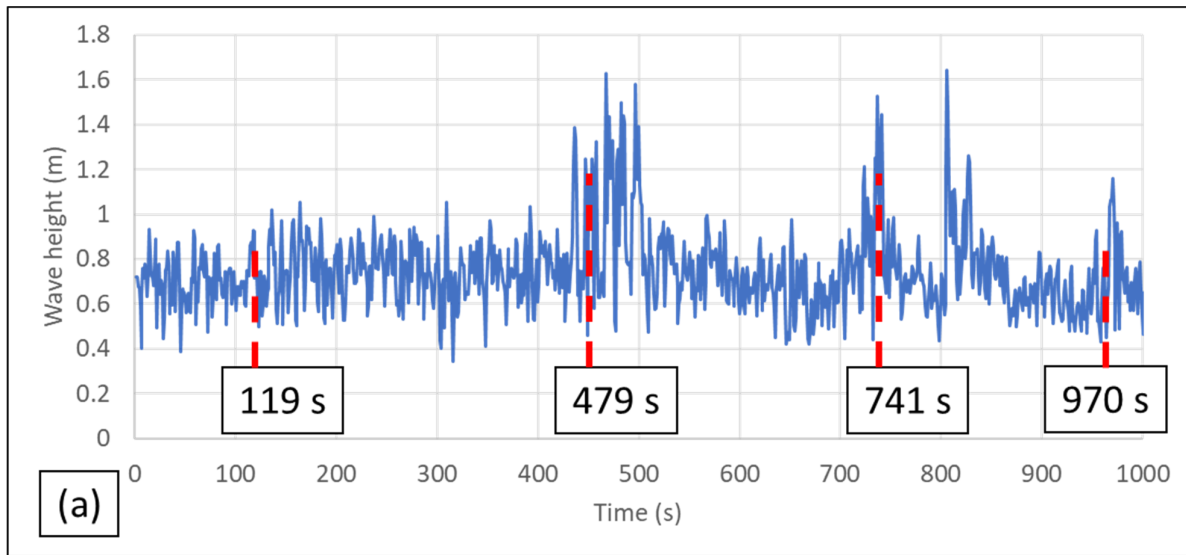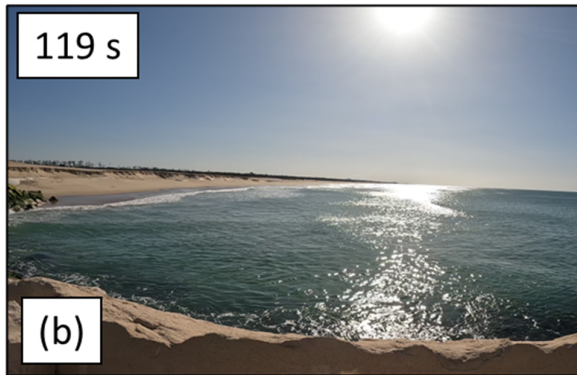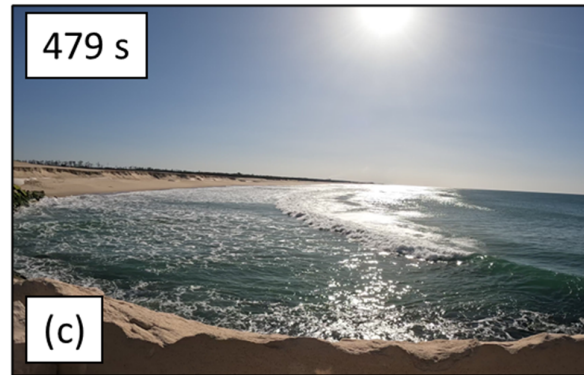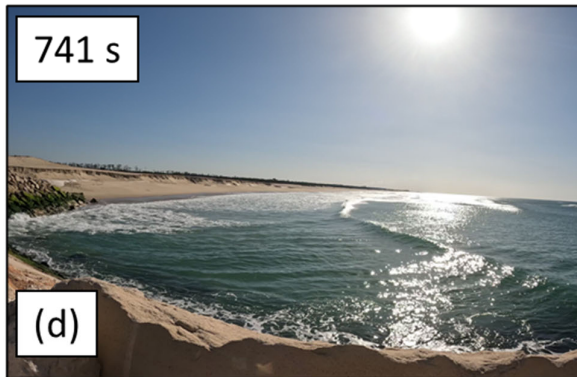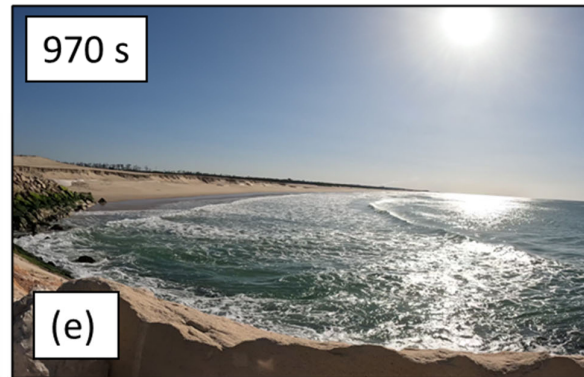

**Figure S7.** Assessment of wave height impacting on Cova Gala (Portugal); (a) scatter plot of wave height obtained by optical flow; (b) frames of action camera at 119 s from starting video; (c) frames of action camera at 479 s from starting video; (d) frames of action camera at 741 s from starting video; (e) frames of action camera at 970 s from starting video.
